# Supplementary material for: The Composite Material of (PEDOT-Polystyrene Sulfonate)/Chitosan-AuNPS-Glutaraldehyde/as the Base to a Sensor with Laccase for the Determination of Polyphenols
Source: MDPI journal article supplement (doi:10.3390/ma16145113), 2023-07-20
Supplement: s1 [file s1]

# The Composite Material of (PEDOT-Polystyrene Sulfonate)/Chitosan-AuNPS-Glutaraldehyde/as the Base to a Sensor with Laccase for the Determination of Polyphenols

Paweł Krzyczmonik <sup>1,\*</sup>, Marta Klisowska <sup>1</sup>, Andrzej Leniart <sup>1</sup>, Katarzyna Ranošek-Soliwoda <sup>2</sup>, Jakub Surmacki <sup>3</sup>, Karolina Beton-Mysur <sup>3</sup> and Beata Brożek-Płuska <sup>3</sup>

<sup>1</sup> Department of Inorganic and Analytical Chemistry, Faculty of Chemistry, University of Lodz, Tamka 12, 91-403 Lodz, Poland

<sup>2</sup> Department of Materials Technology and Chemistry, Faculty of Chemistry, University of Lodz, Pomorska 163 Street, 90-236 Lodz, Poland; katarzyna.ranoszek.soliwoda@chemia.uni.lodz.pl

<sup>3</sup> Laboratory of Laser Molecular Spectroscopy, Faculty of Chemistry, Institute of Applied Radiation Chemistry, Lodz University of Technology, Wroblewskiego 15, 93-590 Lodz, Poland; jakub.surmacki@p.lodz.pl (J.S.)

\* Correspondence: pawel.krzyczmonik@chemia.uni.lodz.pl

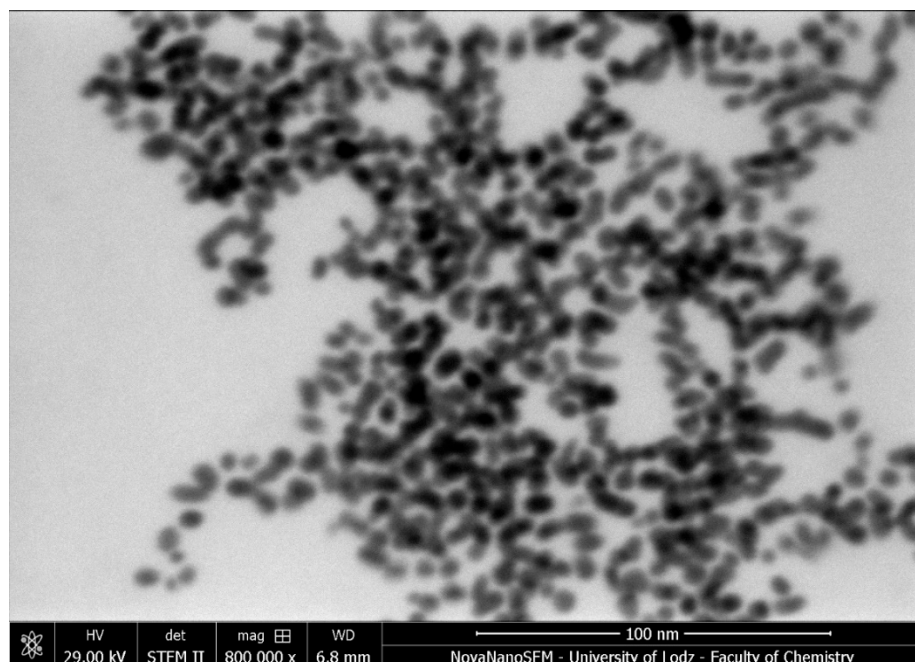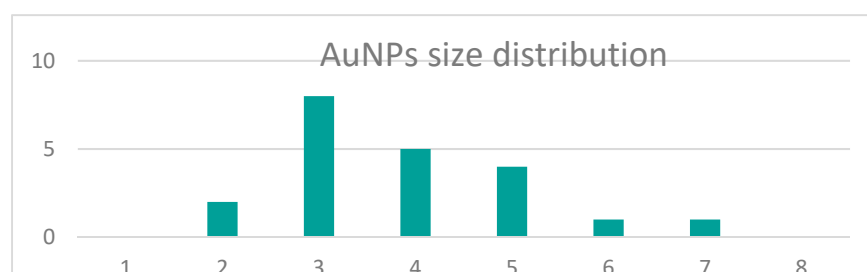

**Figure S1.** (A) SEM image of gold nanoparticles obtained in the synthesis with sodium borohydride. (B) Size distribution histogram of the obtained AuNPs.

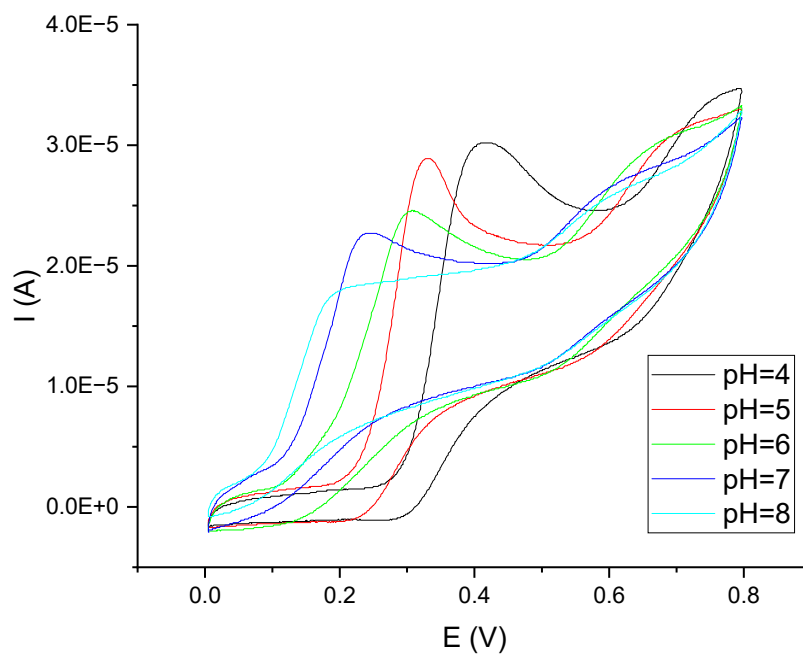

**Figure S2.** Voltammetric curves obtained on GCE in a solution of gallic acid  $C = 0.001$  M in phosphate-citrate buffer different pH ( $v=200\text{mV/s}$ ). pH=4.0 (black), pH=5.0 (red), pH=6.0 (green), pH=7.0 (blue), pH=8.0 (cyan).

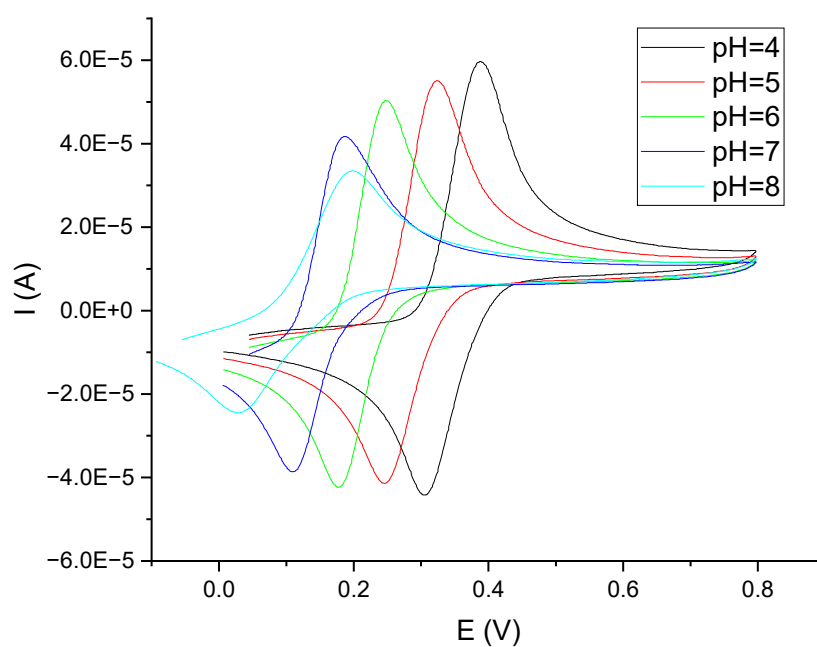

**Figure S3.** Voltammetric curves obtained on GCE in a solution of caffeic acid  $C = 0.001$  M in phosphate-citrate buffer different pH ( $v=200\text{mV/s}$ ). pH=4.0 (black), pH=5.0 (red), pH=6.0 (green), pH=7.0 (blue), pH=8.0 (cyan).

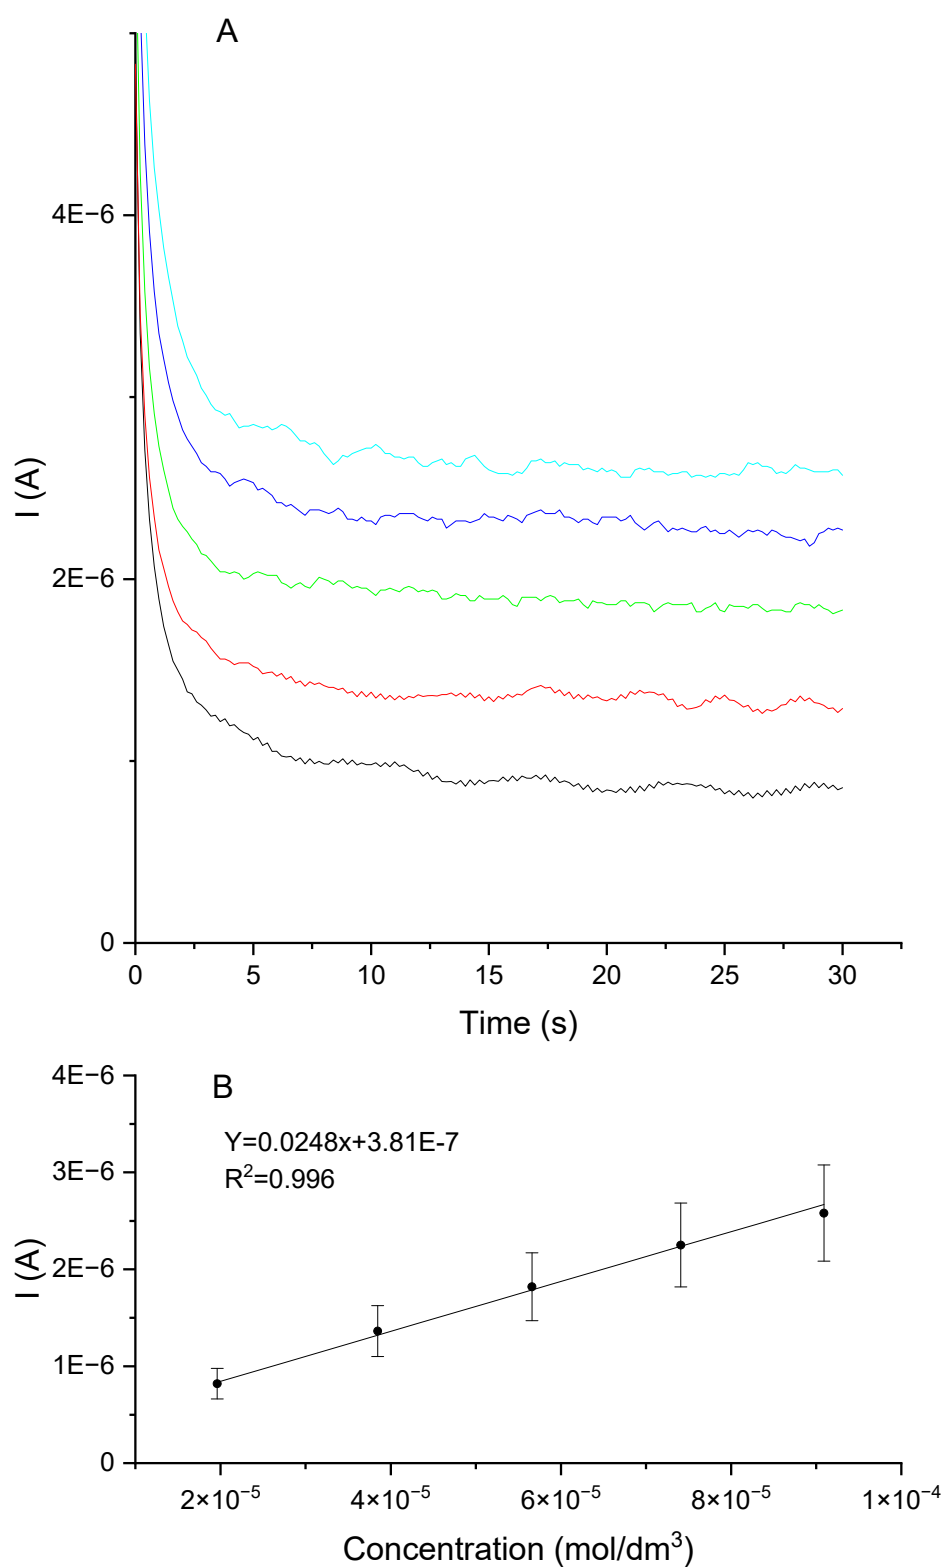

**Figure S4.** (A) Amperometric curves for sensor GCE/PEDOT-PSSLi/Chit-AuNPs-GA/laccase in solutions of catechol in phosphate-citrate buffer pH = 5.0. (B) Standard line for catechol.

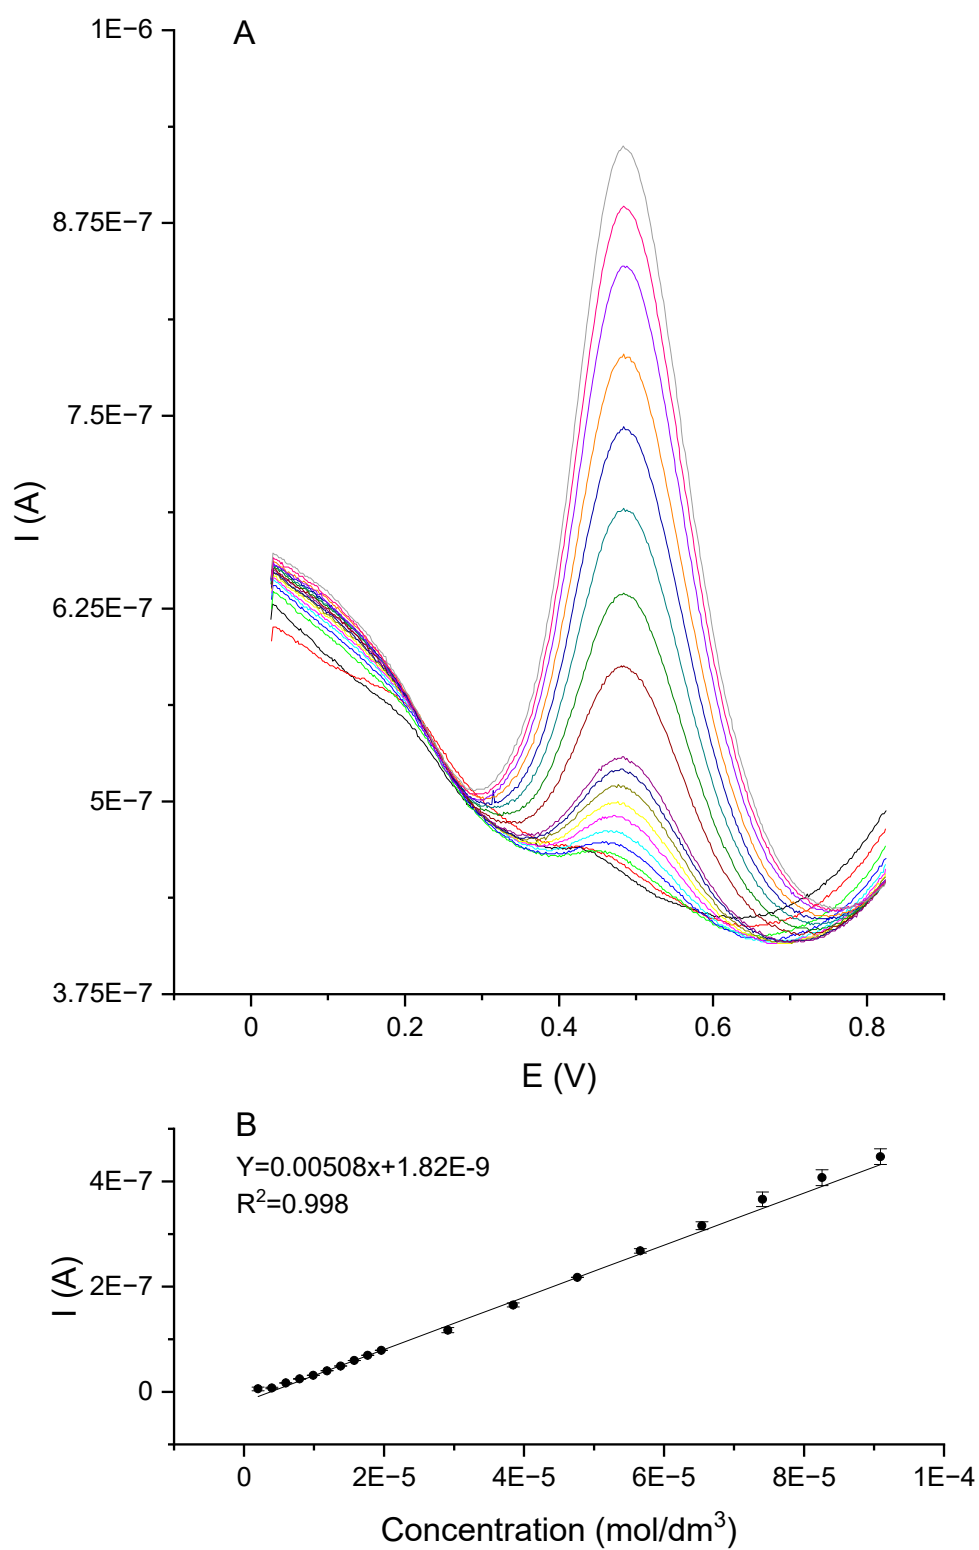

**Figure S5.** (A) DPV voltammetry curves for catechol solutions in phosphate-citrate buffer pH = 5.0. (B) Standard line for catechol.

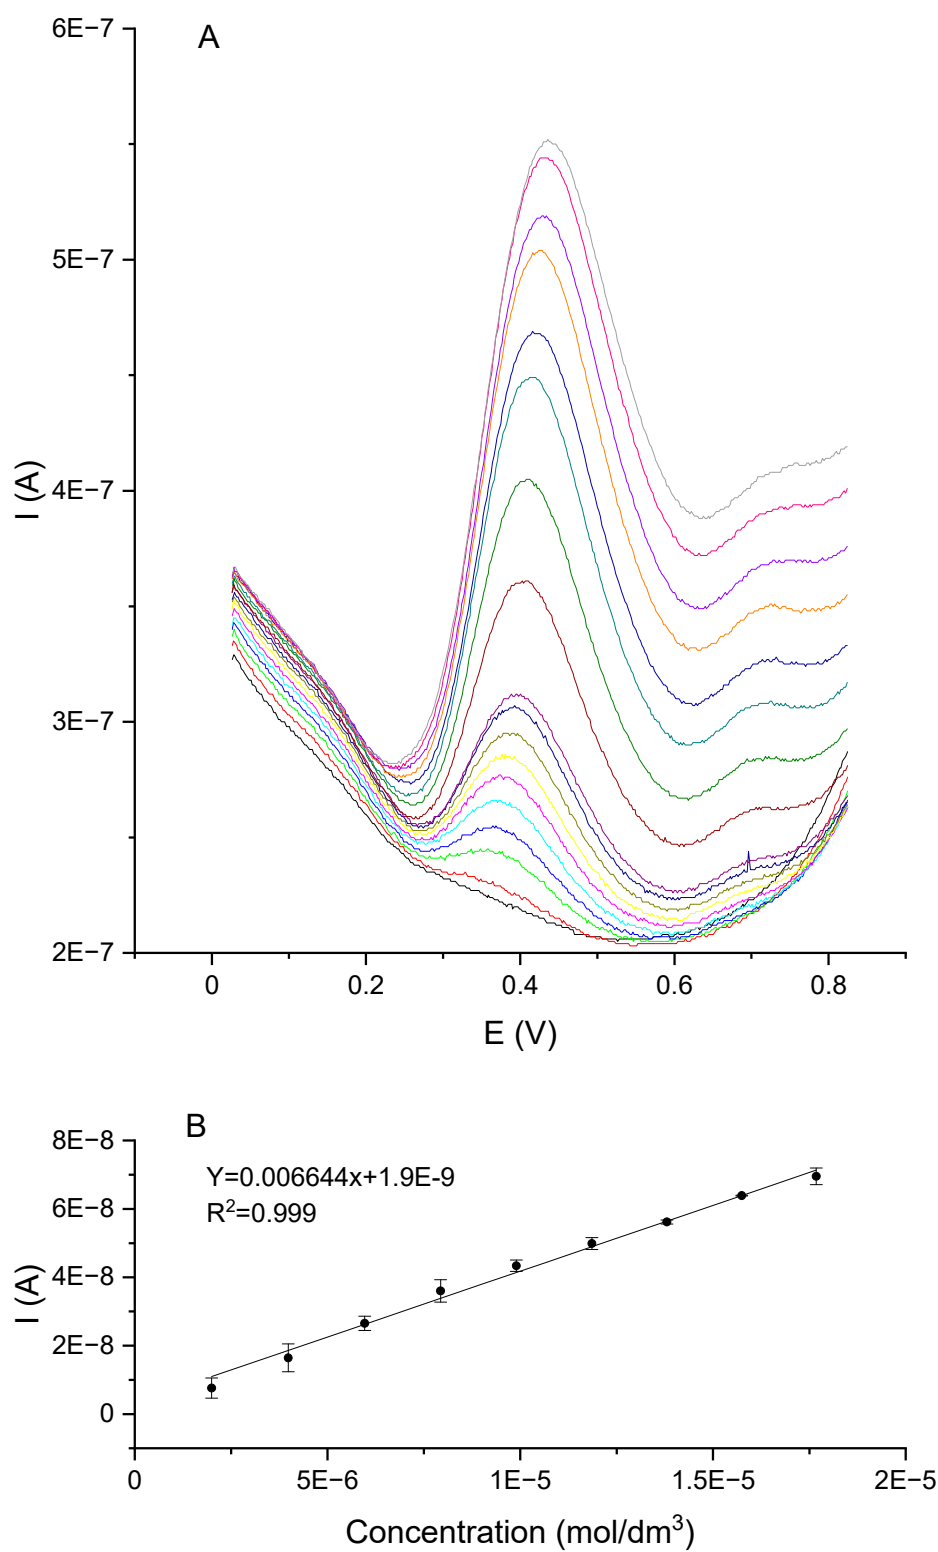

**Figure S6.** (A) DPV voltammetry curves for gallic acid solutions in phosphate-citrate buffer pH = 5.0. (B) Standard line for gallic acid.

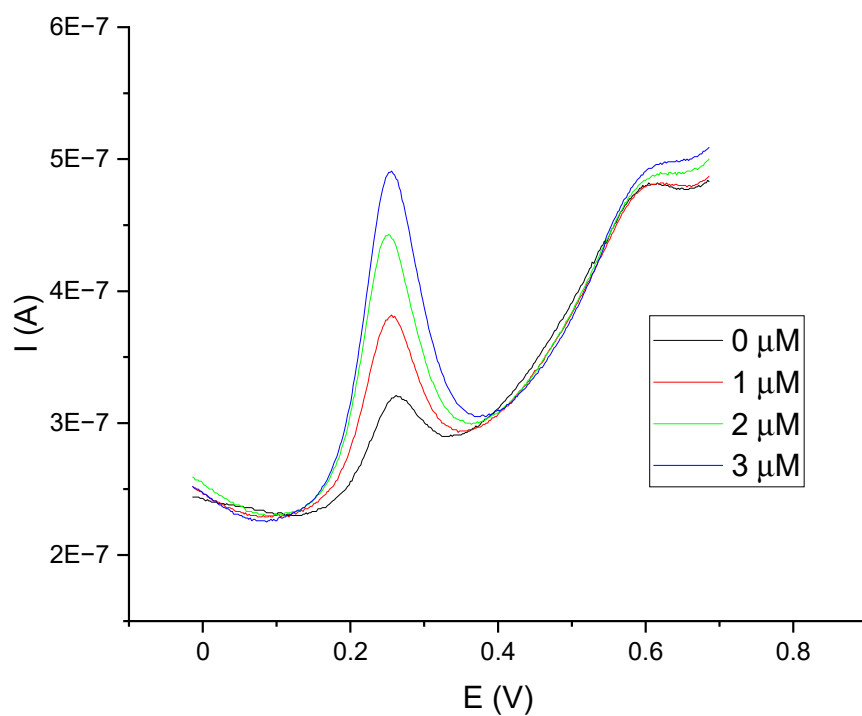

**Figure S7.** DPV voltammetry curves of gallic acid obtained using the standard addition method for the GCE/PEDOT-PSSLi/Chit-AuNPs-GA/laccase sensor in white wine samples. The standard addition was  $1\mu\text{M}$ .
